# Supplementary material for: Integrating oxophilic and protophilic properties in a multivalent Co9S8@CoMoPx electrode to boost alkaline hydrogen evolution
Source: Royal Society of Chemistry journal article supplement (doi:10.1039/d4ey00252k), 2024-12-26
Supplement: d4ey00252k1.pdf [file d4ey00252k1.pdf]

## Supporting Information

### **Integrating oxophilic and protophilic properties on multivalent Co<sub>9</sub>S<sub>8</sub>@CoMoP<sub>x</sub> electrode to boost alkaline hydrogen evolution**

Xijie Chen,<sup>a</sup> Fengming Zhang,<sup>a</sup> Xiao Wang,<sup>a</sup> Fangming Liu,<sup>a</sup> Jinhan Li,<sup>a</sup> Meng Yu,<sup>\*a</sup>  
Fangyi Cheng<sup>\*ab</sup>

<sup>a</sup> *Key Laboratory of Advanced Energy Materials Chemistry (Ministry of Education), Engineering Research Center of High-efficiency Energy Storage (Ministry of Education), College of Chemistry, Nankai University, Tianjin 300071, China;*

<sup>b</sup> *Haihe Laboratory of Sustainable Chemical Transformations, Tianjin 300192, China.*

---

\* Corresponding authors.

*E-mail address:* nkyu2023@nankai.edu.cn (M. Yu), fycheng@nankai.edu.cn (F. Cheng).

## 1 Experimental

### 1.1 Materials and Measurements

$\text{CoSO}_4 \cdot 7\text{H}_2\text{O}$  (99% metals basis),  $\text{Na}_2\text{MoO}_4 \cdot 2\text{H}_2\text{O}$  (99% metals basis),  $\text{NaH}_2\text{PO}_2 \cdot \text{H}_2\text{O}$  (99%),  $\text{C}_6\text{H}_5\text{O}_7\text{Na}_3$  (98%) and  $\text{Na}_2\text{S}_2\text{O}_3 \cdot 5\text{H}_2\text{O}$  (99.5%) were purchased from Aladdin. The conductive substrate used in this work is nickel foam (NF, Sinero) with the thickness of 0.5 mm. All the above reagents were used as received unless otherwise noted.

Scanning electron microscopy (SEM) equipped with an energy-dispersive X-ray spectroscopy (EDS) was performed in JEOL JSM-7900F microscope. Transmission electron microscopy (TEM) with EDS and selected area electron diffraction (SAED) system was conducted on FEI Talos F200X G2 microscope. X-ray diffraction (XRD) measurements were conducted using a Rigaku Mini Flex 600 powdered with  $\text{Cu-K}\alpha$  radiation. X-ray photoelectron spectroscopy (XPS) were carried out on AXIS ULTRA employing  $\text{Al-K}\alpha$  X-ray source. Raman measurements were performed with a confocal Raman microscope (LabRAM HR Evolution, Horiba) with 532 nm laser. The atomic ratio of materials and metal ions concentration in the electrolyte were detected by the inductively coupled plasma-optical emission spectrometry (ICP-OES, SpectroBlue).

### 1.2 Synthesis of self-supported electrocatalysts

#### 1.2.1 Synthesis of $\text{Co}_9\text{S}_8@\text{CoMoP}_x$ electrode

$\text{Co}_9\text{S}_8@\text{CoMoP}_x$  was prepared on NF by continuous two-step electrodeposition method. Before electrodeposition, NF was treated by ethanol, 3 M HCl and deionized water in sequence. The pretreated NF and graphite rod were used as working and counter electrode, respectively. The deposition electrolyte for the bottom  $\text{CoMoP}_x$  is: 45 mM  $\text{CoSO}_4 \cdot 7\text{H}_2\text{O}$ , 15 mM  $\text{Na}_2\text{MoO}_4 \cdot 2\text{H}_2\text{O}$ , 0.5 M  $\text{NaH}_2\text{PO}_2 \cdot \text{H}_2\text{O}$  and 0.15 M  $\text{Na}_3\text{C}_6\text{H}_5\text{O}_7$ , in which  $\text{CoSO}_4 \cdot 7\text{H}_2\text{O}$  and  $\text{Na}_2\text{MoO}_4 \cdot 2\text{H}_2\text{O}$  provide Co and Mo source, and  $\text{NaH}_2\text{PO}_2 \cdot \text{H}_2\text{O}$  is regarded as both P source and reductant. The  $\text{Na}_3\text{C}_6\text{H}_5\text{O}_7$  serves as the complexing agent for the active deposition of metal ions. The first electrodeposition was carried out at constant current density of  $-0.1 \text{ A cm}^{-2}$  for 5~20 min, and argon gas was continuously injected into the deposition solution. The prepared electrode was cleaned with deionized water and dried at 60 °C in a vacuum oven to obtain the self-supported  $\text{CoMoP}_x$  electrode. Then, the  $\text{CoMoP}_x$  was immersed in the second deposition electrolyte containing 0.05M  $\text{CoSO}_4 \cdot 7\text{H}_2\text{O}$ , 0.1 M  $\text{Na}_2\text{MoO}_4 \cdot 2\text{H}_2\text{O}$  and deposited at  $-10 \text{ mA cm}^{-2}$  for 1~4 min. After cleaning and drying, the  $\text{Co}_9\text{S}_8@\text{CMP}$  cathode with different layer thickness was obtained.

### 1.2.2 Synthesis of other electrocatalysts

CoMoP<sub>x</sub>, Co<sub>9</sub>S<sub>8</sub> and CoP self-supported electrodes were prepared by one-step electrodeposition. The deposition electrolyte of the CoMoP<sub>x</sub> electrode is described in section 1.2.1, and was obtained by cathode current deposition with  $-0.1 \text{ A cm}^{-2}$  for 15 min. The deposition electrolyte of Co<sub>9</sub>S<sub>8</sub> catalyst is also same as that in section 1.2.1, with deposition condition of  $-10 \text{ mA cm}^{-2}$  for 3 min. CoP was prepared at  $-10 \text{ mA cm}^{-2}$  for 10 min in the electrolyte containing 25 mM CoSO<sub>4</sub>·7H<sub>2</sub>O, 0.5 M NaH<sub>2</sub>PO<sub>2</sub>·H<sub>2</sub>O and 0.1 M Na<sub>2</sub>MoO<sub>4</sub>·2H<sub>2</sub>O without Mo source.

### 1.3 Electrochemical measurements

The electrochemical measurements were carried out on Ivium-n-Stat using standard three-electrode system with as-prepared self-supported electrocatalysts, Hg/HgO electrode and Pt foil as working, reference and counter electrode, respectively. The polarization curves were collected in 1.0 M KOH solution with scan rate of  $10 \text{ mV s}^{-1}$  for linear sweep voltammetry (LSV) and  $50 \text{ mV s}^{-1}$  for cyclic voltammetry (CV) curves. Electrochemical impedance spectroscopy (EIS) measurement was performed with frequencies ranging from 100 kHz to 0.1 Hz and an amplitude of 10 mV. Operando EIS measurement was carried out by applying the overpotential from 0 to 180 mV with an interval of 20 mV vs. RHE in 1.0 M KOH. The catalytic stability of the electrode was operated by chronoamperometry and accelerated degradation tests. All the above measured potentials were converted to the reversible hydrogen electrode (vs. RHE) according to the equation:

$$E_{\text{VS.RHE}} = E_{\text{VS.SCE}} + E_{\text{SCE}}^{\theta} + 0.059 \times \text{pH}$$

### 1.3 Assembly of anion exchange membrane water electrolysis device

The commercial Alkymer W-25 anion exchange membrane (AEM) with the thickness of 50 μm was employed. It is worth noting that the size of the AEM should be slightly larger than serpentine channel inside the end plate to avoid short circuit and electrolyte leakage. Thus, the AEM was cropped to  $3.5 \times 3.5 \text{ cm}^2$  and immersed into 1.0 M KOH for 12~24 h to achieve efficacious OH<sup>-</sup> conductivity. The activated AEM was then rinsed with deionized water for further use. The Co<sub>9</sub>S<sub>8</sub>@CoMoP<sub>x</sub> and Ni<sub>3</sub>S<sub>2</sub>@NFP electrode with the size of  $2 \times 2 \text{ cm}^2$  was used as cathode and anode, respectively. The monolithic membrane electrode assembly (MEA) involved three sections with the sandwich structure that AEM membrane in the middle and electrodes on both sides, which was then hot pressing with 1 MPa for 1 min at 40 °C.

## 2 Results and Discussion

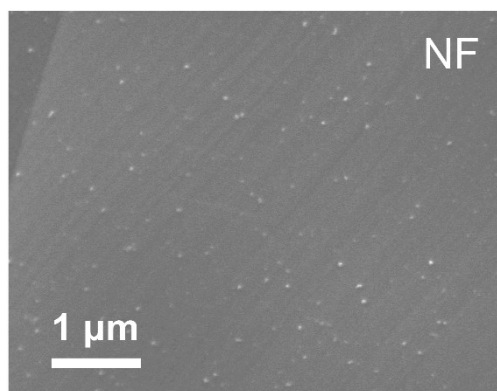

**Fig. S1.** SEM images of blank NF.

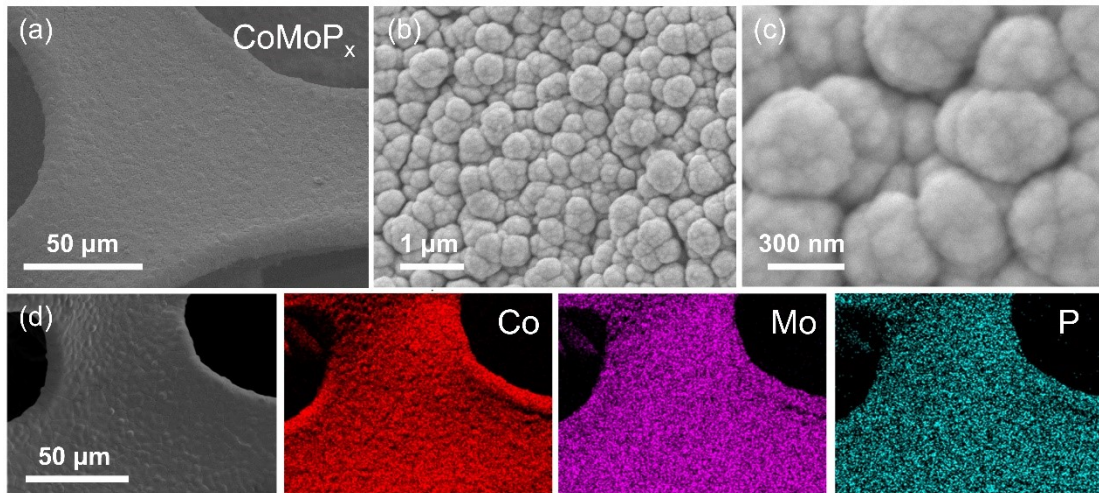

**Fig. S2.** (a-c) The SEM images of CoMoP<sub>x</sub> under different magnifications and (d) the corresponding EDS elemental mappings of Co, Mo and P elements.

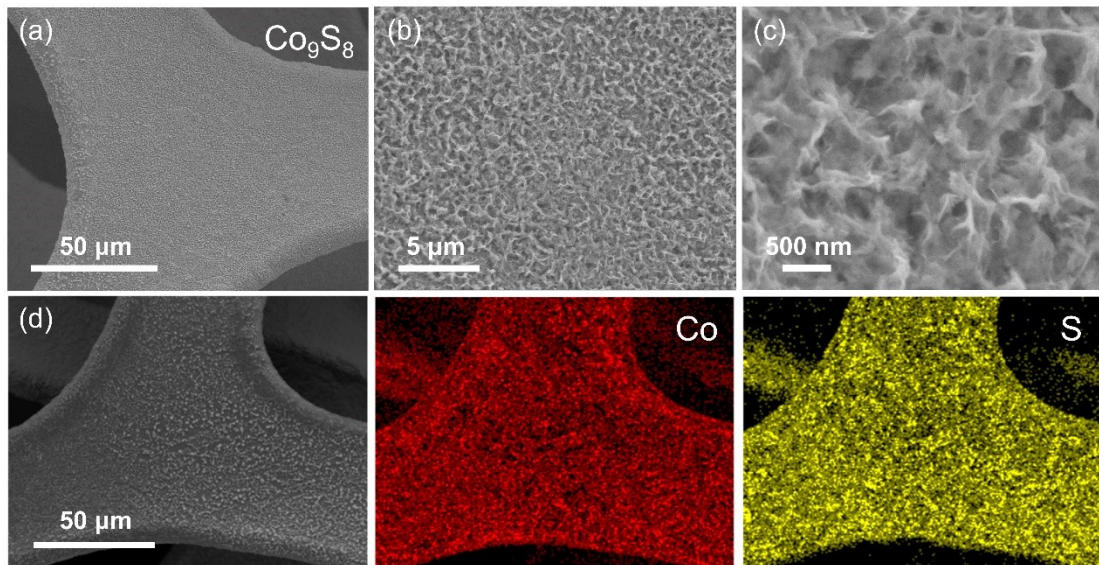

**Fig. S3.** (a-c) The SEM images of  $\text{Co}_9\text{S}_8$  under different magnifications and (d) the corresponding EDS mappings of Co and S elements.

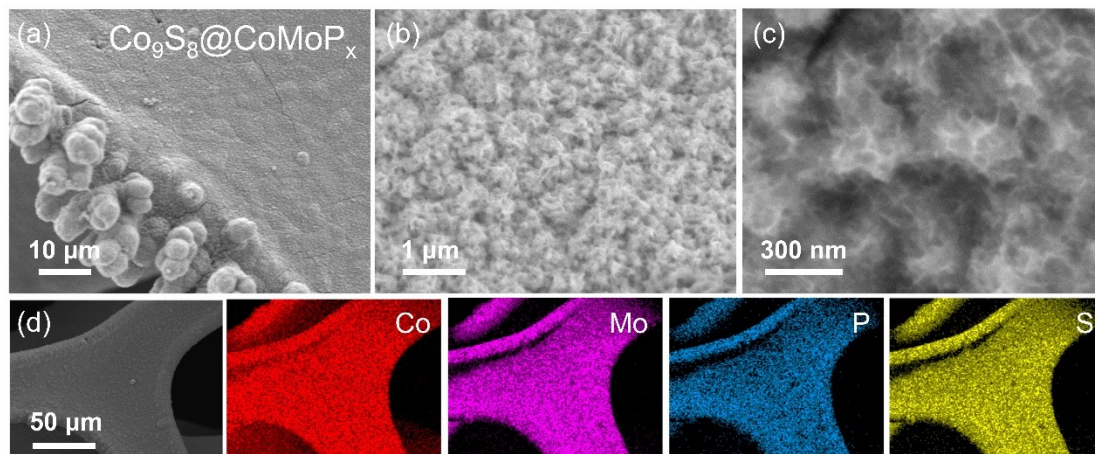

**Fig. S4.** (a-c) The SEM images of  $\text{Co}_9\text{S}_8@\text{CoMoP}_x$  under different magnifications and (d) the corresponding EDS mappings of Co, Mo, P and S elements.

As shown in Fig. S4, simultaneously exposure of Mo, P and S elements in EDS mappings for  $\text{Co}_9\text{S}_8@\text{CoMoP}_x$ , which can be attribute to that surface  $\text{Co}_9\text{S}_8$  with almost nanosheet clusters morphology cannot completely restrain detection of high-energy electron beam. In addition, given that the sampling depth of EDS is about  $1\ \mu\text{m}$  or so, it is possible to observe Mo signals in the elemental mapping, even in the regions covered by  $\text{Co}_9\text{S}_8$ , creating the coexistence of components.

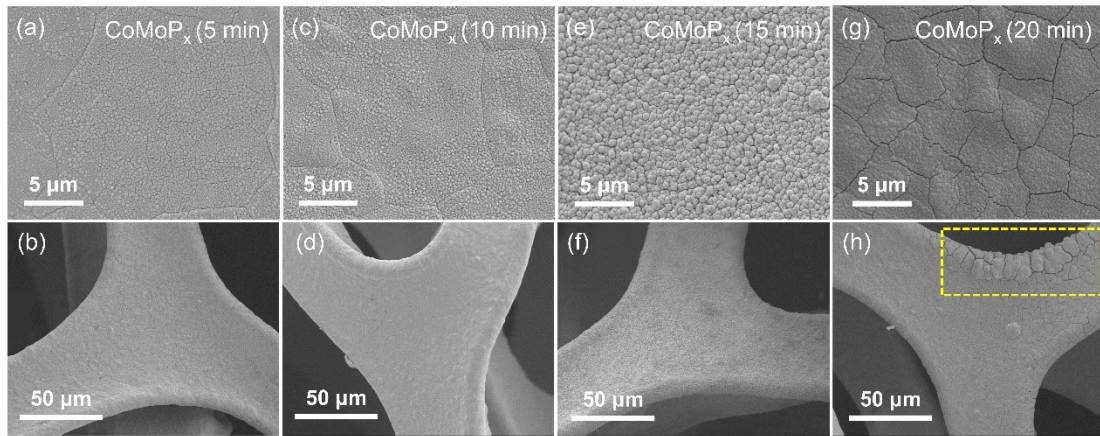

**Fig. S5.** The SEM images of CoMoP<sub>x</sub> with different deposition times.



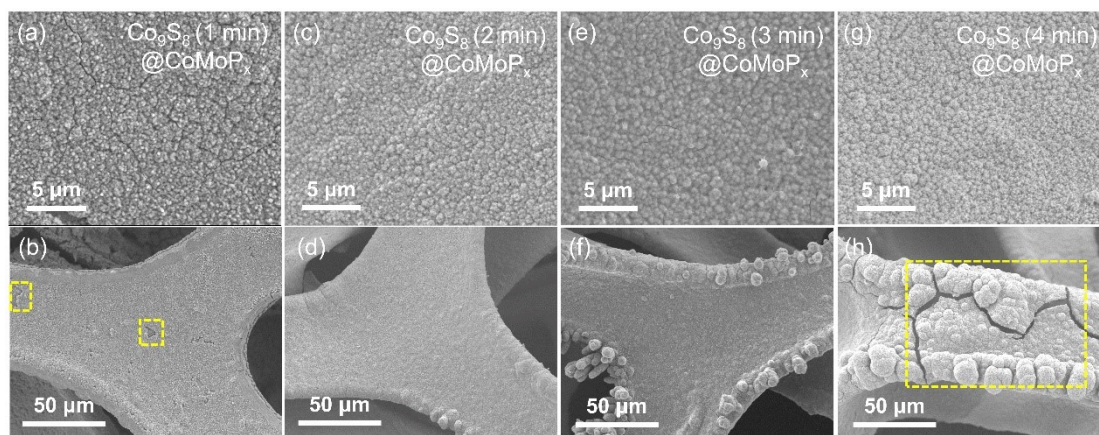

**Fig. S6.** The SEM images of  $\text{Co}_9\text{S}_8$ @ $\text{CoMoP}_x$  with different deposition times of surface  $\text{Co}_9\text{S}_8$ .

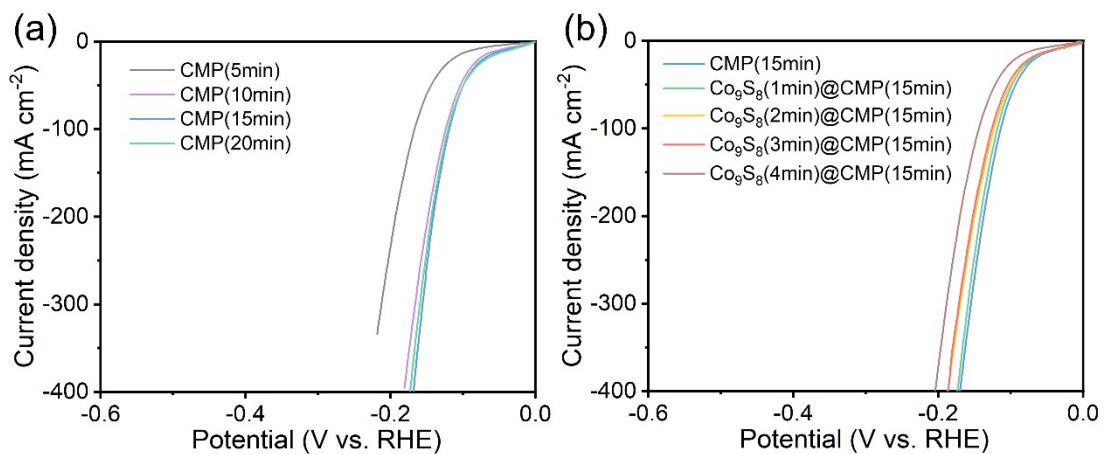

**Fig. S7.** The LSV curves of Co<sub>9</sub>S<sub>8</sub>@CoMoP<sub>x</sub> with different deposition times of (a) CoMoP<sub>x</sub> and (b) Co<sub>9</sub>S<sub>8</sub>.

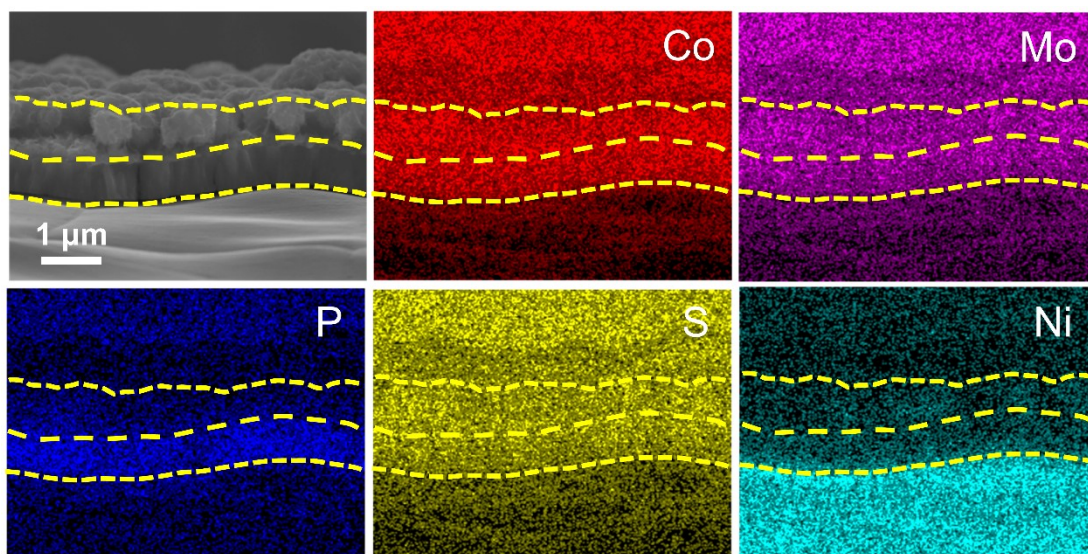

**Fig. S8.** The cross-section EDS mappings of  $\text{Co}_9\text{S}_8@\text{CoMoP}_x$ .

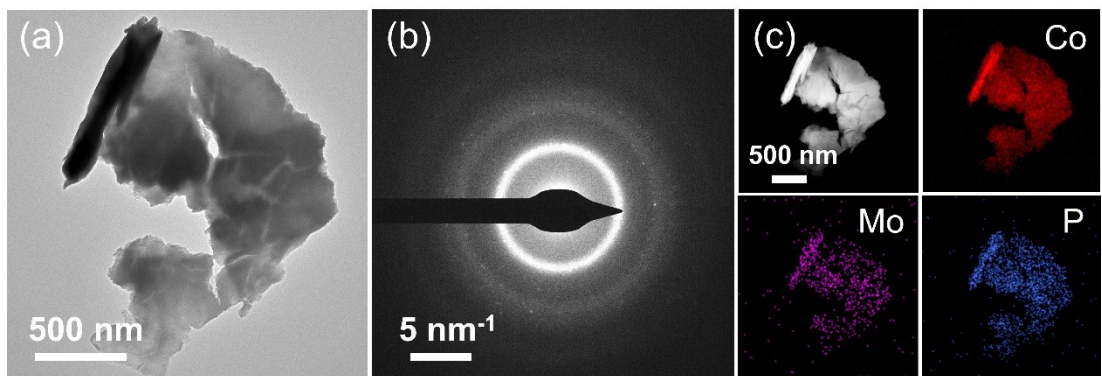

**Fig. S9.** (a) The TEM images and (b) selected area electron diffraction (SAED) pattern of CoMoP<sub>x</sub>. (c) The corresponding EDS elemental mappings of Co, Mo and P elements.

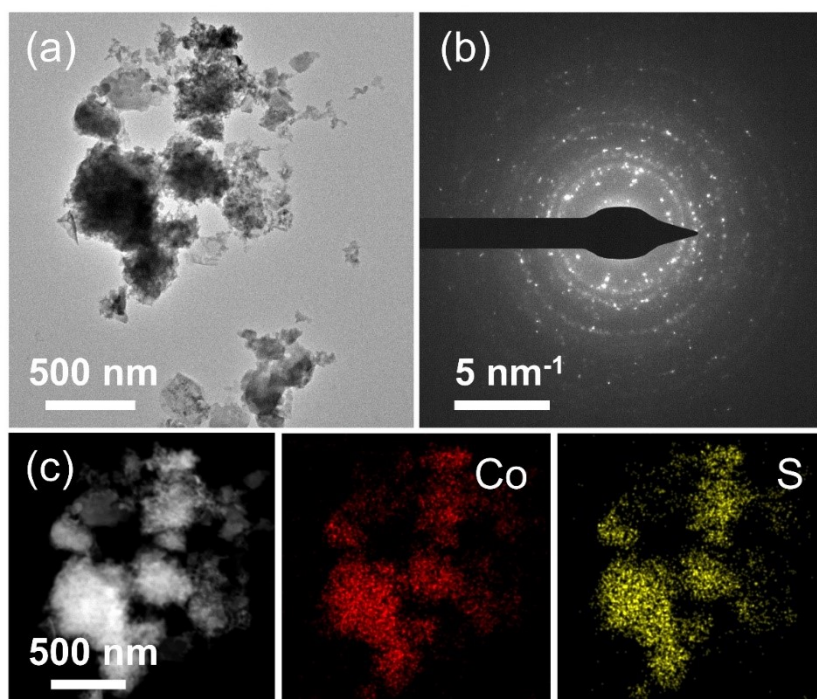

**Fig. S10.** (a) The TEM images and (b) selected area electron diffraction (SAED) pattern of  $\text{Co}_9\text{S}_8$ . (c) The corresponding EDS elemental mappings of Co and S elements.

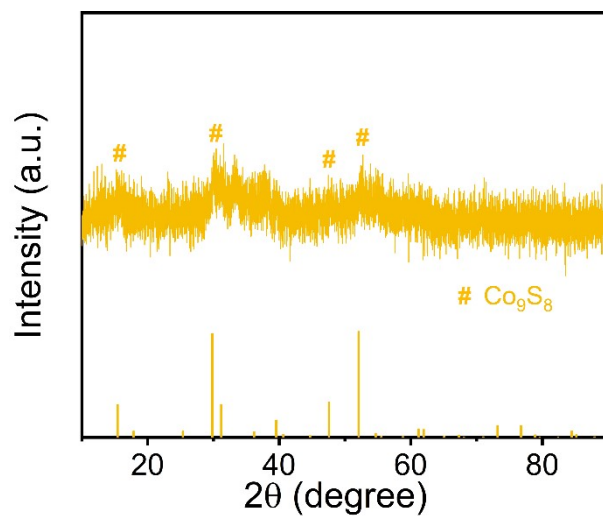

**Fig. S11.** The XRD pattern of  $\text{Co}_9\text{S}_8$ .

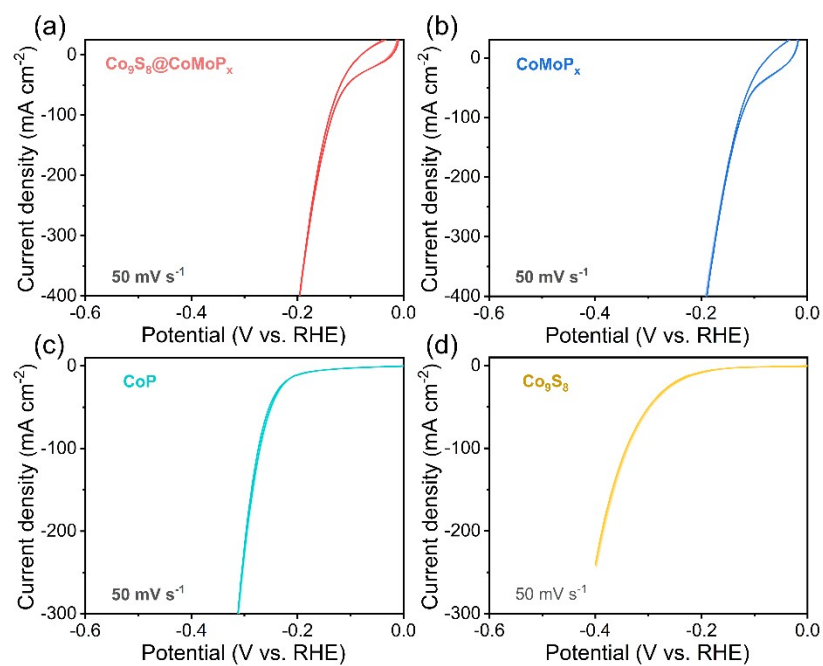

**Fig. S12.** CV test of (a)  $\text{Co}_9\text{S}_8@\text{CoMoP}_x$ , (b)  $\text{CoMoP}_x$ , (c)  $\text{CoP}$  and (d)  $\text{Co}_9\text{S}_8$  at  $50 \text{ mV s}^{-1}$  in  $1.0 \text{ M KOH}$ .

The peaks at low potentials can be attributed to the activation of Mo or electrochemical capacitance at large scan rate.

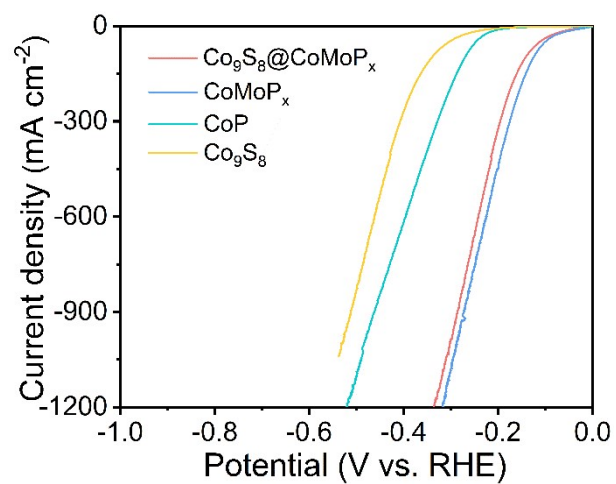

**Fig. S13.** The LSV curves of different electrodes in 1.0 mol L<sup>-1</sup> KOH with 95% iR-compensation.



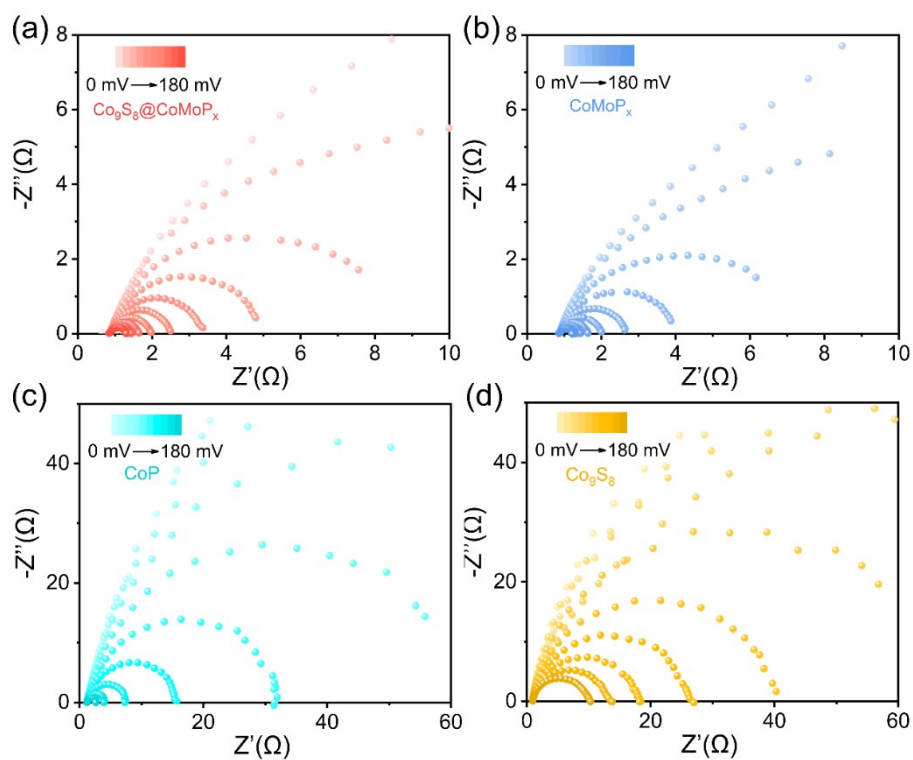

**Fig. S14.** The EIS diagrams of (a)  $\text{Co}_9\text{S}_8@\text{CoMoP}_x$ , (b)  $\text{CoMoP}_x$ , (c)  $\text{CoP}$  and (d)  $\text{Co}_9\text{S}_8$  at different overpotentials vs. RHE.

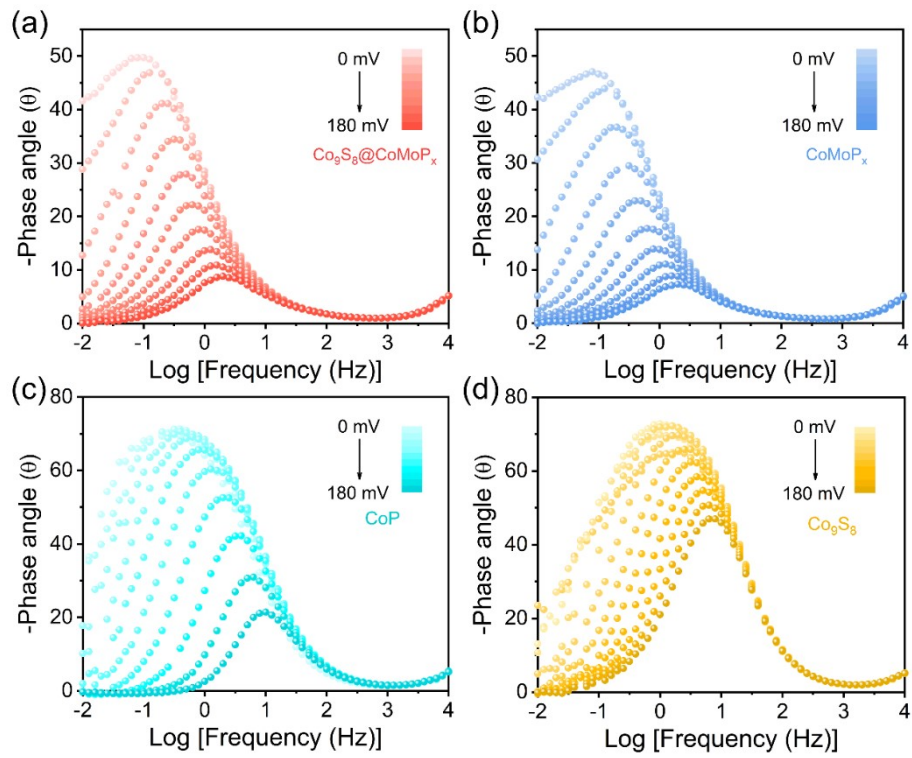

**Fig. S15.** The Bode phase plots of (a)  $\text{Co}_9\text{S}_8@\text{CoMoP}_x$ , (b)  $\text{CoMoP}_x$ , (c)  $\text{CoP}$  and (d)  $\text{Co}_9\text{S}_8$  at different overpotentials vs. RHE.

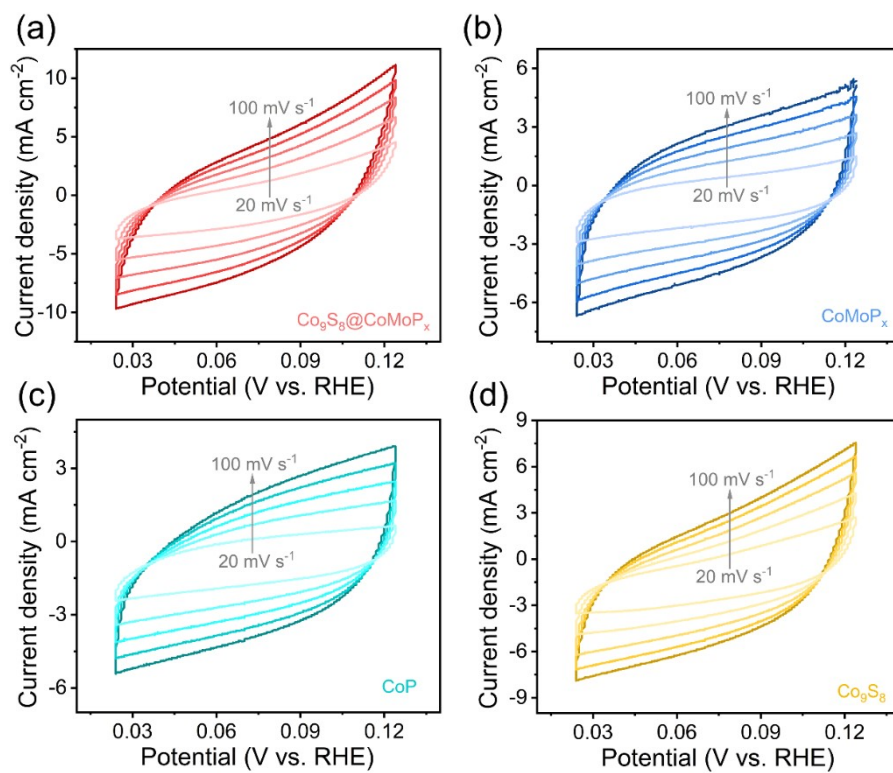

**Fig. S16.** The CV curves of (a)  $\text{Co}_9\text{S}_8@\text{CoMoP}_x$ , (b)  $\text{CoMoP}_x$ , (c)  $\text{CoP}$  and (d)  $\text{Co}_9\text{S}_8$  in the non-polarized region at different scan rates.

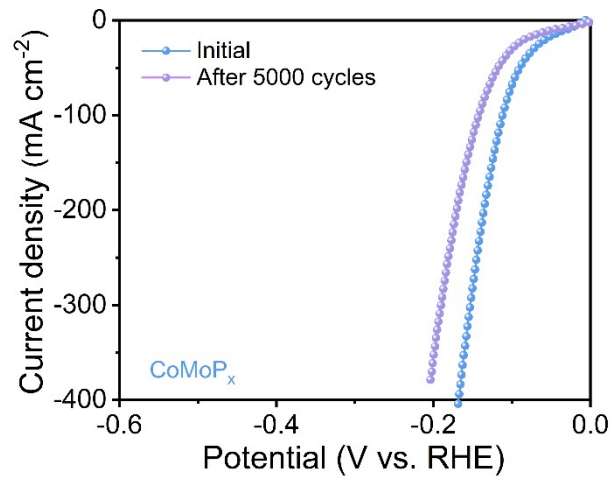

**Fig. S17.** The accelerated duration test of CoMoP<sub>x</sub> with 50 mV s<sup>-1</sup> scan rate.

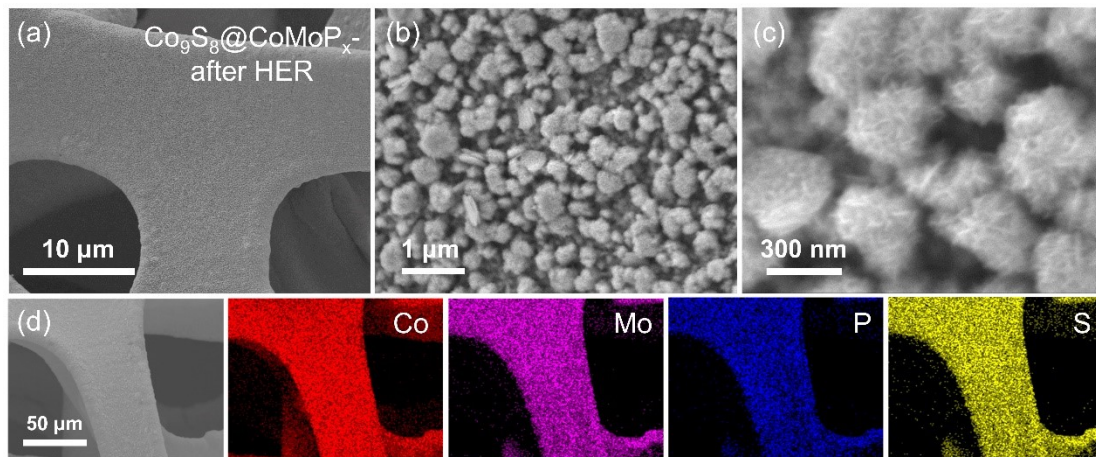

**Fig. S18.** (a-c) The SEM images of  $\text{Co}_9\text{S}_8@\text{CoMoP}_x$  after chronopotentiometry test at different magnifications and (d) the corresponding EDS mappings of Co, Mo, P and S elements.

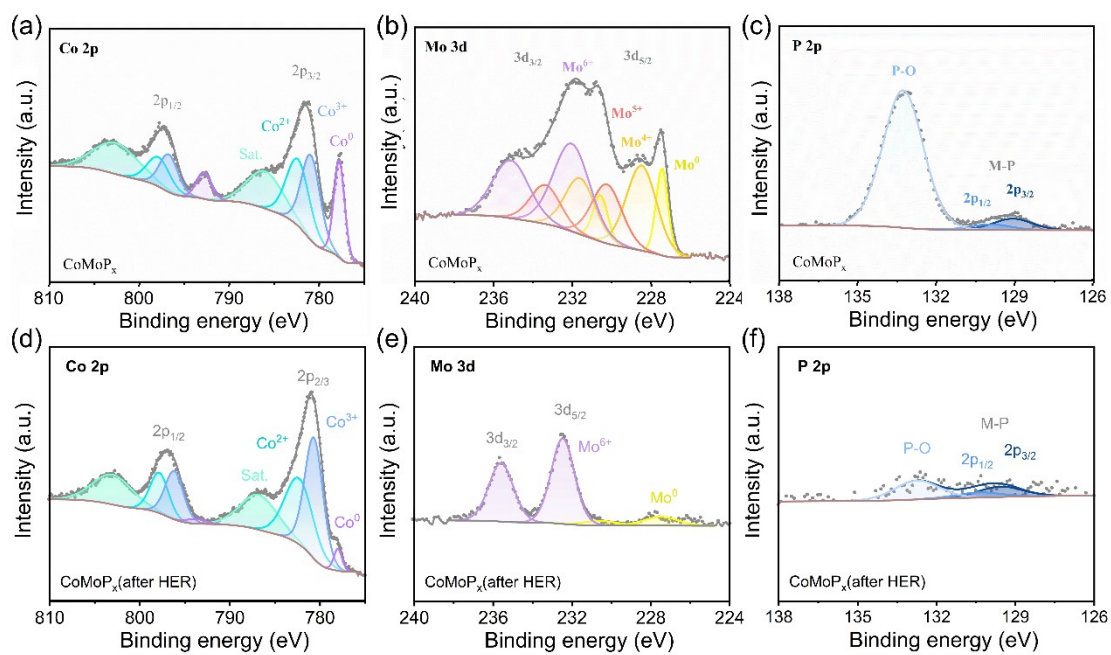

**Fig. S19.** The high resolution XPS spectra of (a) Co 2p, (b) P 2p for CoMoP<sub>x</sub> before HER progress, and (c) Co 2p, (d) P 2p for CoP after HER.

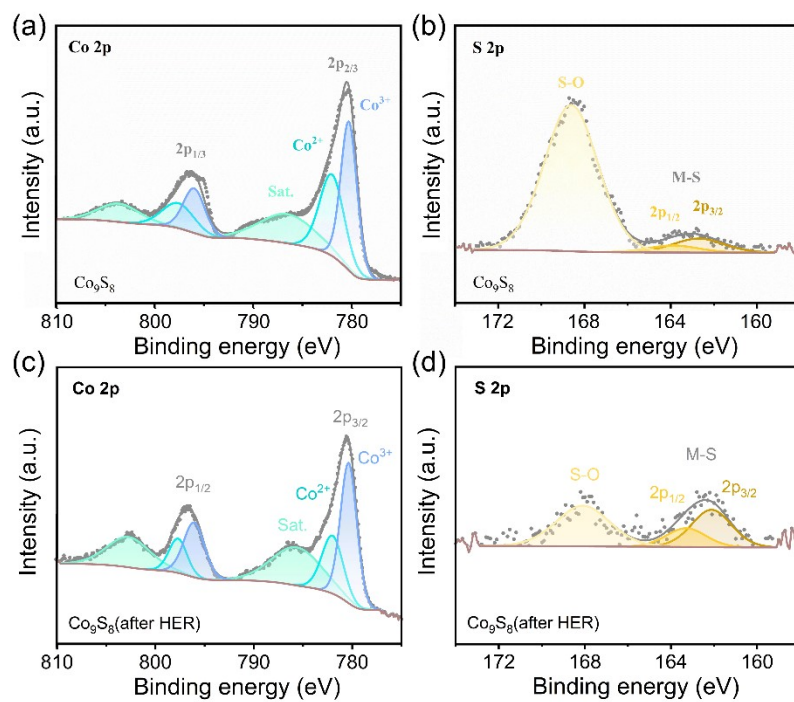

**Fig. S20.** The high resolution XPS spectra of (a) Co 2p, (b) P 2p for CoP before HER progress, and (c) Co 2p, (d) P 2p for Co<sub>9</sub>S<sub>8</sub> after HER.

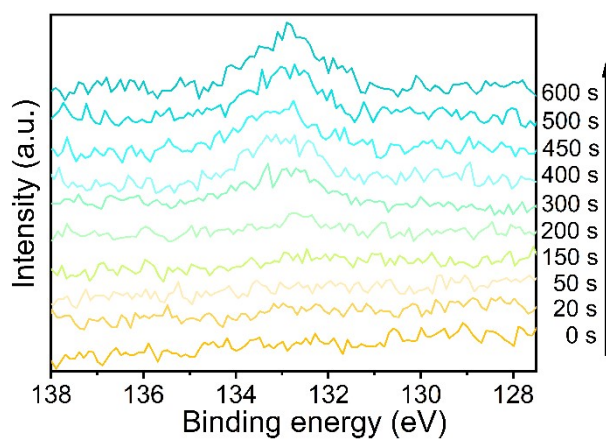

**Fig. S21.** XPS spectra of P 2p for  $\text{Co}_9\text{S}_8@\text{CoMoP}_x$  after stability test at different etching levels.

As demonstrated in Fig. S24, the signal of P element appears as the etching time reach 300 s. The P 2p peak maintained with the increasing of etching times, manifesting existence of P element in bulk  $\text{Co}_9\text{S}_8@\text{CoMoP}_x$  catalyst due to the protection role of  $\text{Co}_9\text{S}_8$ .



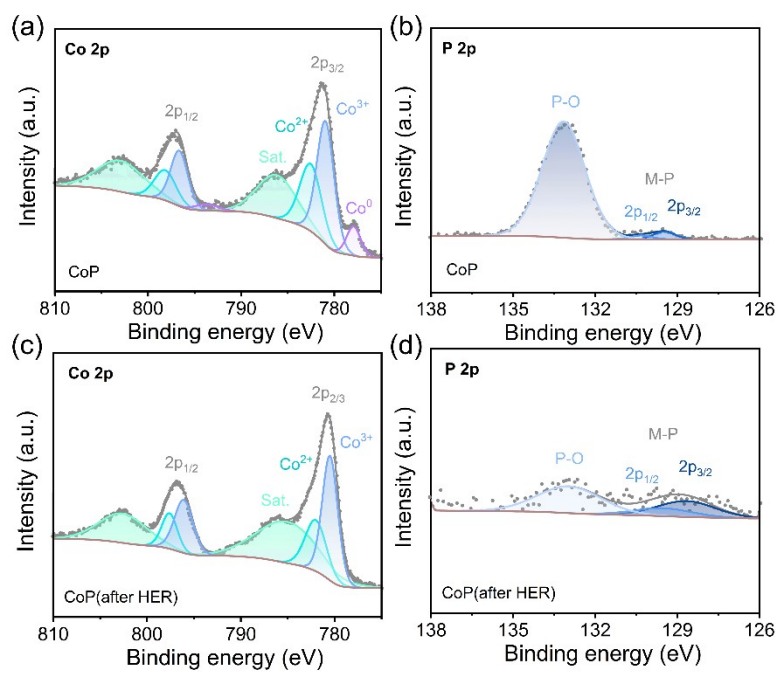

**Fig. S22.** The high resolution XPS spectra of (a) Co 2p, (b) P 2p for CoP before HER progress, and (c) Co 2p, (d) P 2p for CoP after HER.

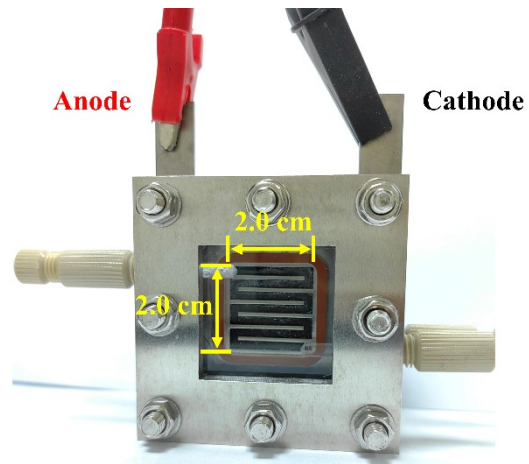

**Fig. S23.** The optical picture of AEMWE device.

**Table S1.** The ICP-OES results of Co, Mo, P and S in different electrocatalysts.

| Electrode                                          | Co content<br>(mmol L <sup>-1</sup> ) | Mo content<br>(mmol L <sup>-1</sup> ) | P content<br>(mmol L <sup>-1</sup> ) | S content<br>(mmol L <sup>-1</sup> ) |
|----------------------------------------------------|---------------------------------------|---------------------------------------|--------------------------------------|--------------------------------------|
| CoMoP <sub>x</sub>                                 | 20.53                                 | 3.54                                  | 4.29                                 | /                                    |
| Co <sub>9</sub> S <sub>8</sub>                     | 4.64                                  | /                                     | /                                    | 2.56                                 |
| Co <sub>9</sub> S <sub>8</sub> @CoMoP <sub>x</sub> | 25.45                                 | 4.54                                  | 3.47                                 | 3.02                                 |

**Table S2.** The ICP-OES results of Co, Mo, P and S in different electrolytes.

| Electrolyte                                                                                        | Co content<br>(mmol L <sup>-1</sup> ) | Mo content<br>(mmol L <sup>-1</sup> ) | P content<br>(mmol L <sup>-1</sup> ) | S content<br>(mmol L <sup>-1</sup> ) |
|----------------------------------------------------------------------------------------------------|---------------------------------------|---------------------------------------|--------------------------------------|--------------------------------------|
| Original 1 M KOH                                                                                   | 0.0003                                | /                                     | /                                    | /                                    |
| 1 M KOH after<br>Chronopotentiometry test<br>of CoMoP <sub>x</sub>                                 | 0.0033                                | 0.0540                                | 0.0638                               | /                                    |
| 1 M KOH after<br>Chronopotentiometry test<br>of Co <sub>9</sub> S <sub>8</sub> @CoMoP <sub>x</sub> | 0.0057                                | 0.0195                                | 0.0365                               | 0.0238                               |

**Table S3.** Comparison of HER performance of Co<sub>9</sub>S<sub>8</sub>@CoMoP<sub>x</sub> in this work and recently reported transition-metal-based catalysts.

| Catalyst                                             | Overpotential (mV)                 | Stability test<br>current density<br>(mA cm <sup>-2</sup> ) | Stability<br>duration<br>(h) | Reference            |
|------------------------------------------------------|------------------------------------|-------------------------------------------------------------|------------------------------|----------------------|
| <b>Co<sub>9</sub>S<sub>8</sub>@CoMoP<sub>x</sub></b> | <b>41@-10 mA cm<sup>-2</sup></b>   | <b>-500</b>                                                 | <b>1000</b>                  | <b>This<br/>work</b> |
|                                                      | <b>126@-100 mA cm<sup>-2</sup></b> |                                                             |                              |                      |
|                                                      | <b>226@-500 mA cm<sup>-2</sup></b> |                                                             |                              |                      |
| CoMoP                                                | 62.3@-10 mA cm <sup>-2</sup>       | -200                                                        | 55                           | Ref. <sup>1</sup>    |
| MoS <sub>2</sub> /Ni <sub>2</sub> O <sub>3</sub> H   | 84@-10 mA cm <sup>-2</sup>         | -10                                                         | 45                           | Ref. <sup>2</sup>    |
|                                                      | 200@-217 mA cm <sup>-2</sup>       |                                                             |                              |                      |
| CoP <sub>3</sub> /CoMoP/NF                           | 110@-10 mA cm <sup>-2</sup>        | -10                                                         | 20                           | Ref. <sup>3</sup>    |
| HNAs                                                 |                                    |                                                             |                              |                      |
| CoP/CoMoP                                            | 34@-10 mA cm <sup>-2</sup>         | -10                                                         | 12                           | Ref. <sup>4</sup>    |
|                                                      | 94@-100 mA cm <sup>-2</sup>        |                                                             |                              |                      |
| CoS <sub>2</sub> /MoS <sub>2</sub>                   | 76@-10 mA cm <sup>-2</sup>         | -400                                                        | 16                           | Ref. <sup>5</sup>    |
| Co <sub>9</sub> S <sub>8</sub> -MoS <sub>2</sub> /NF | 167@-10 mA cm <sup>-2</sup>        | -80                                                         | 20                           | Ref. <sup>6</sup>    |
|                                                      | 250@-250 mA cm <sup>-2</sup>       |                                                             |                              |                      |
| MoS <sub>2</sub> /CoNi <sub>2</sub> S <sub>4</sub>   | 78@-10 mA cm <sup>-2</sup>         | -10                                                         | 48                           | Ref. <sup>7</sup>    |
|                                                      | 160@-100 mA cm <sup>-2</sup>       |                                                             |                              |                      |
|                                                      | 190@-300 mA cm <sup>-2</sup>       |                                                             |                              |                      |
| 5%La-CoMoP                                           | 49@-10 mA cm <sup>-2</sup>         | -10                                                         | 20                           | Ref. <sup>8</sup>    |
| CoMoP/CoP/NF                                         | 54@-10 mA cm <sup>-2</sup>         | -50                                                         | 18                           | Ref. <sup>9</sup>    |
|                                                      | 127@-100 mA cm <sup>-2</sup>       |                                                             |                              |                      |
| NiFe-<br>LDH@CoMo-<br>P/NF                           | 49@-10 mA cm <sup>-2</sup>         | -100                                                        | 60                           | Ref. <sup>10</sup>   |
|                                                      | 138@-100 mA cm <sup>-2</sup>       |                                                             |                              |                      |
| Co-1T-MoS <sub>2</sub> -bpe-<br>350                  | 118@-10 mA cm <sup>-2</sup>        | -20                                                         | 50                           | Ref. <sup>11</sup>   |
|                                                      | 145@-100 mA cm <sup>-2</sup>       |                                                             |                              |                      |

---

|                                         |                              |      |     |                    |
|-----------------------------------------|------------------------------|------|-----|--------------------|
|                                         | 239@-200 mA cm <sup>-2</sup> |      |     |                    |
| CoMoP@C                                 | 81@-10 mA cm <sup>-2</sup>   | -10  | 24  | Ref. <sup>12</sup> |
| NF@CoFeP                                | 80@-10 mA cm <sup>-2</sup>   | -300 | 50  | Ref. <sup>13</sup> |
|                                         | 145@-100 mA cm <sup>-2</sup> |      |     |                    |
| Cu-FeOOH/Fe <sub>3</sub> O <sub>4</sub> | 129@-100 mA cm <sup>-2</sup> | -100 | 100 | Ref. <sup>14</sup> |
|                                         | 285@-500 mA cm <sup>-2</sup> |      |     |                    |

---

### 3 Reference

- 1 H. Wang, C. Niu, W. Liu and S. Tao, *Appl. Catal., B*, 2024, **340**, 123249.
- 2 J. Hu, C. Zhang, Y. Zhang, B. Yang, Q. Qi, M. Sun, F. Zi, M. K. H. Leung and B. Huang, *Small*, 2020, **16**, 2002212.
- 3 D. Jiang, Y. Xu, R. Yang, D. Li, S. Meng and M. Chen, *ACS Sustainable Chem. Eng.*, 2019, **7**, 9309-9317.
- 4 X. Huang, X. Xu, X. Luan and D. Cheng, *Nano Energy*, 2020, **68**, 104332.
- 5 P. Liu, J. Yan, J. Mao, J. Li, D. Liang and W. Song, *J. Mater. Chem. A*, 2020, **8**, 11435-11441.
- 6 M. Kim, M. A. R. Anjum, M. Choi, H. Y. Jeong, S. H. Choi, N. Park and J. S. Lee, *Adv. Funct. Mater.*, 2020, **30**, 2002536.
- 7 J. Hu, C. Zhang, P. Yang, J. Xiao, T. Deng, Z. Liu, B. Huang, M. K. H. Leung and S. Yang, *Adv. Funct. Mater.*, 2019, **30**, 1908520.
- 8 L. Li, K. Chao, X. Liu and S. Zhou, *J. Alloy Compd.*, 2023, **941**, 168952.
- 9 Y. Wei, W. Li, D. Li, L. Yi and W. Hu, *Int. J. Hydrogen Energy*, 2022, **47**, 7783-7792.
- 10 D. Guo, H. Xia, X. Guo, L. Wen, T. Wang, X. Li and Z. Sun, *Int. J. Hydrogen Energy*, 2024, **79**, 73-85.
- 11 H. J. Liu, S. Zhang, Y. M. Chai and B. Dong, *Angew. Chem., Int. Ed.*, 2023, **62**, e202313845.
- 12 Y. Ma, C.-X. Wu, X.-J. Feng, H.-Q. Tan, L.-K. Yan, Y. Liu, Z.-H. Kang, E.-B. Wang and Y.-G. Li, *Energy Environ. Sci.*, 2017, **10**, 788-798.
- 13 J.-Z. Zhang, Z. Zhang, H.-B. Zhang, Y. Mei, F. Zhang, P.-X. Hou, C. Liu, H.-M. Cheng and J.-C. Li, *Nano Lett.*, 2023, **23**, 8331-8338.
- 14 C. Yang, W. Zhong, K. Shen, Q. Zhang, R. Zhao, H. Xiang, J. Wu, X. Li and N. Yang, *Adv. Energy Mater.*, 2022, **12**, 2200077.
